# Supplementary material
Source: PubMed Central journal article supplement (PMC1183561)

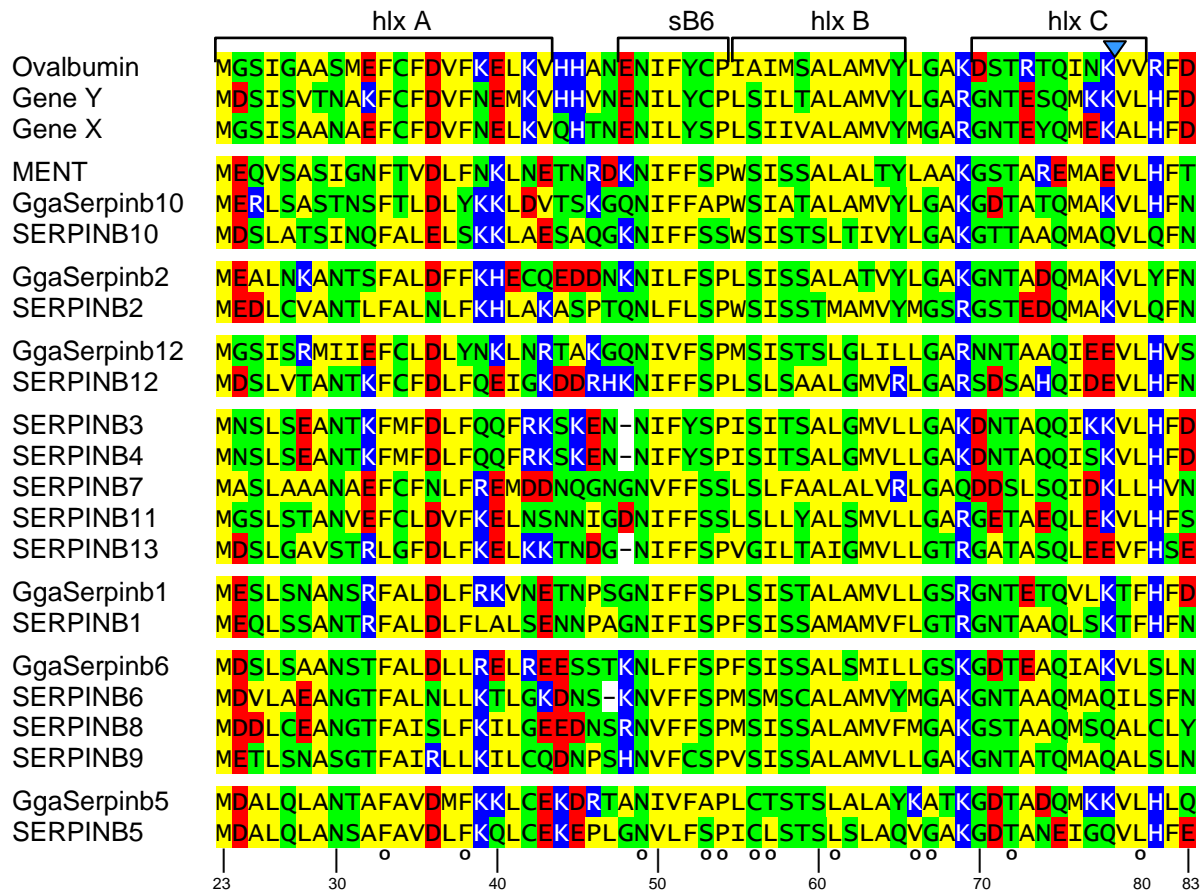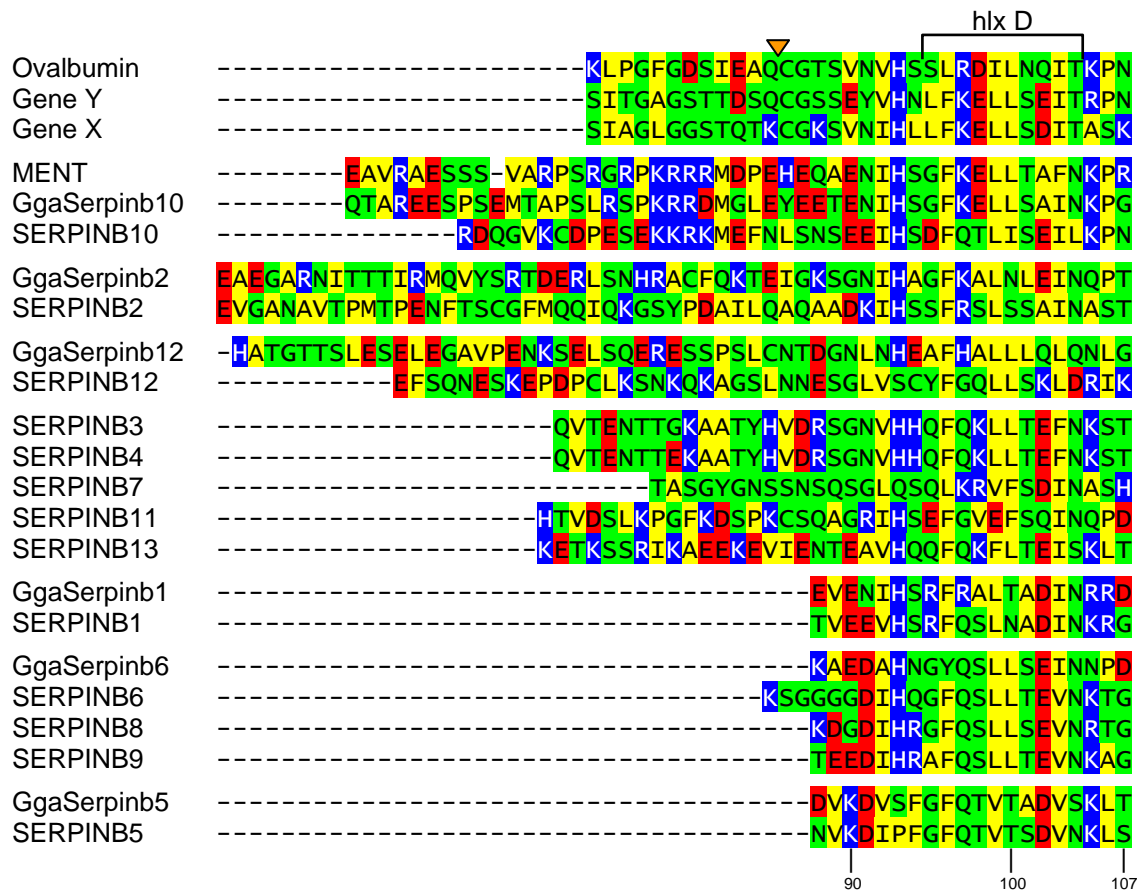

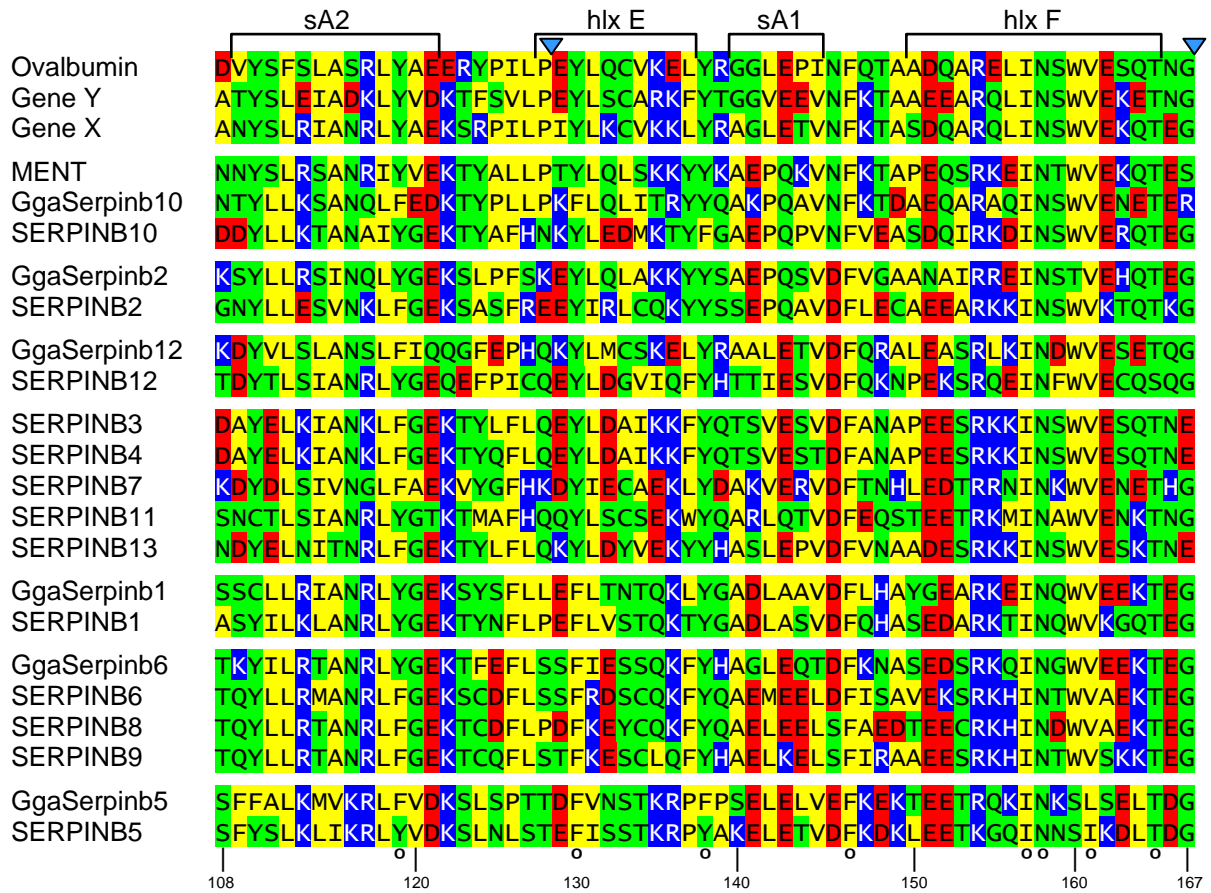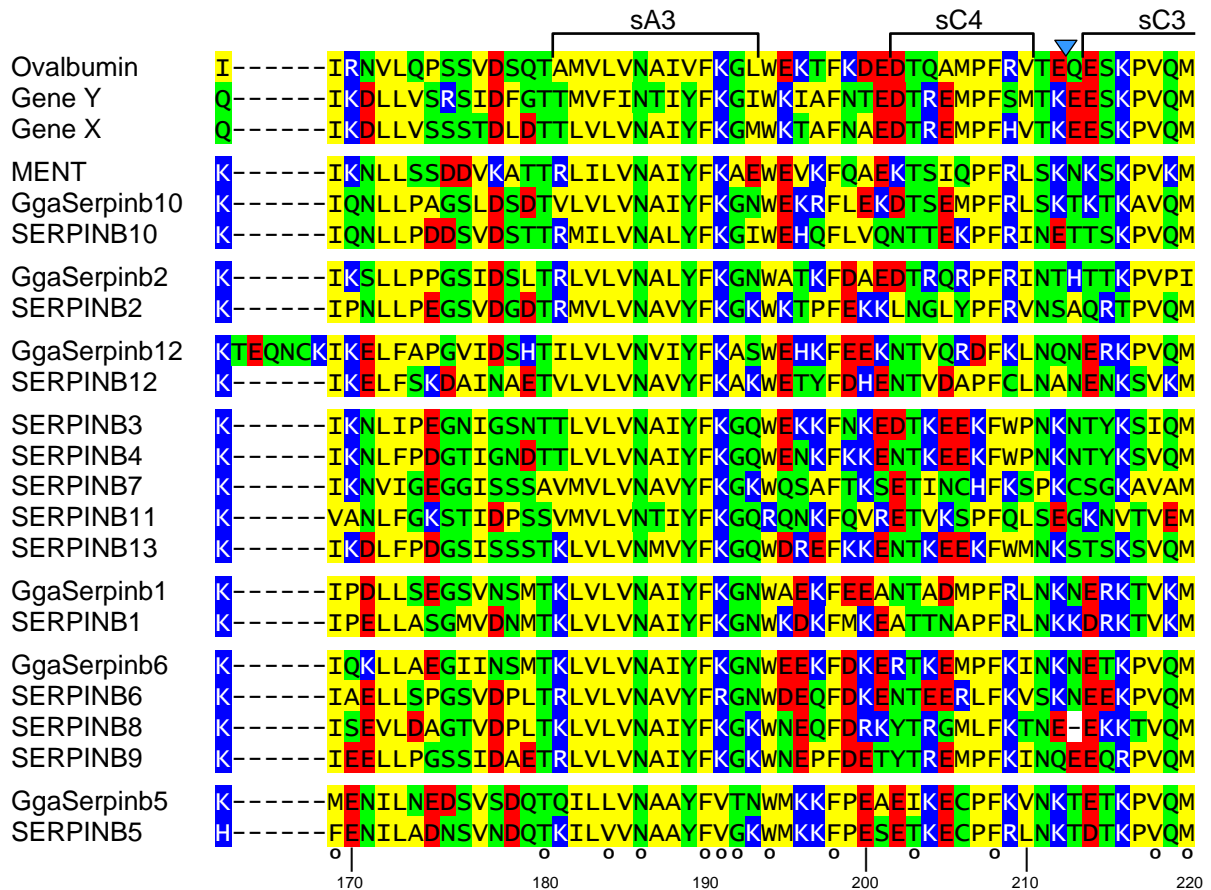

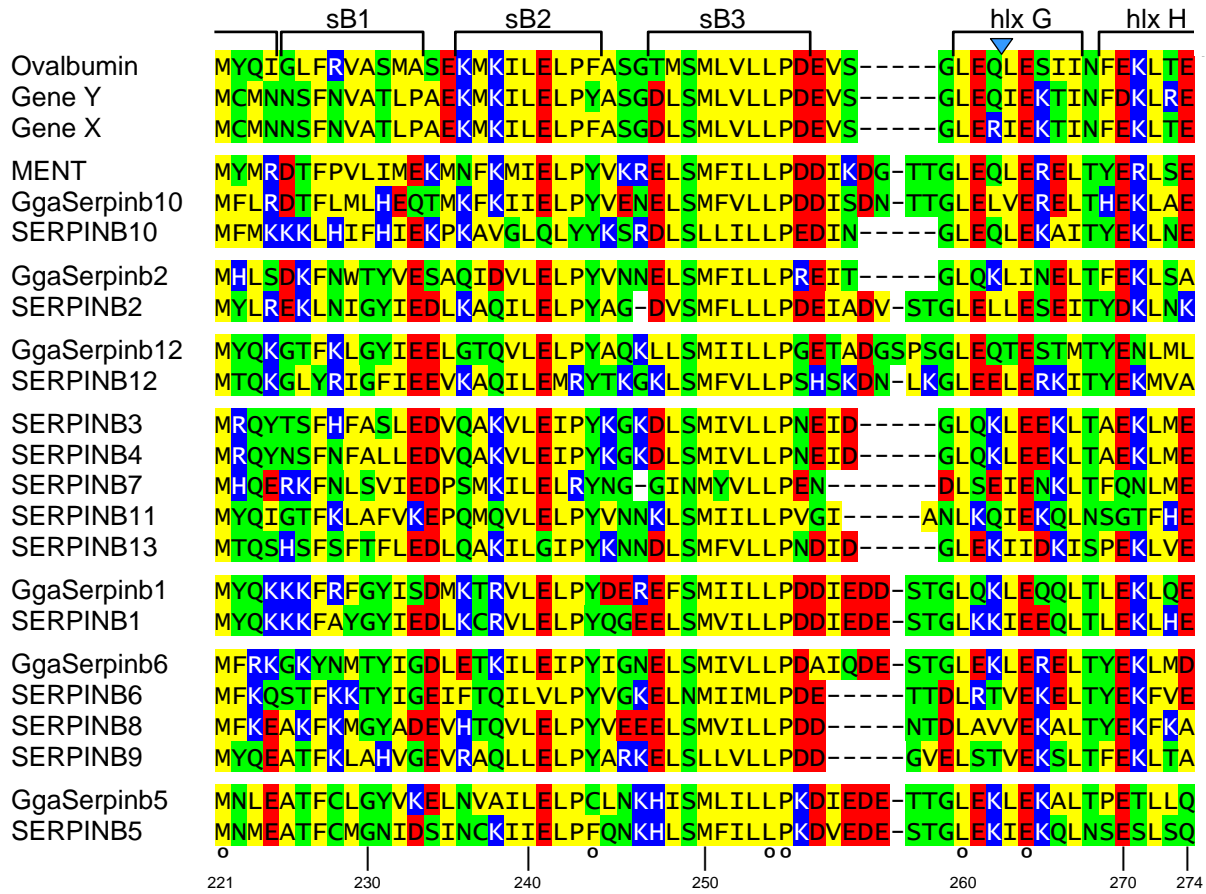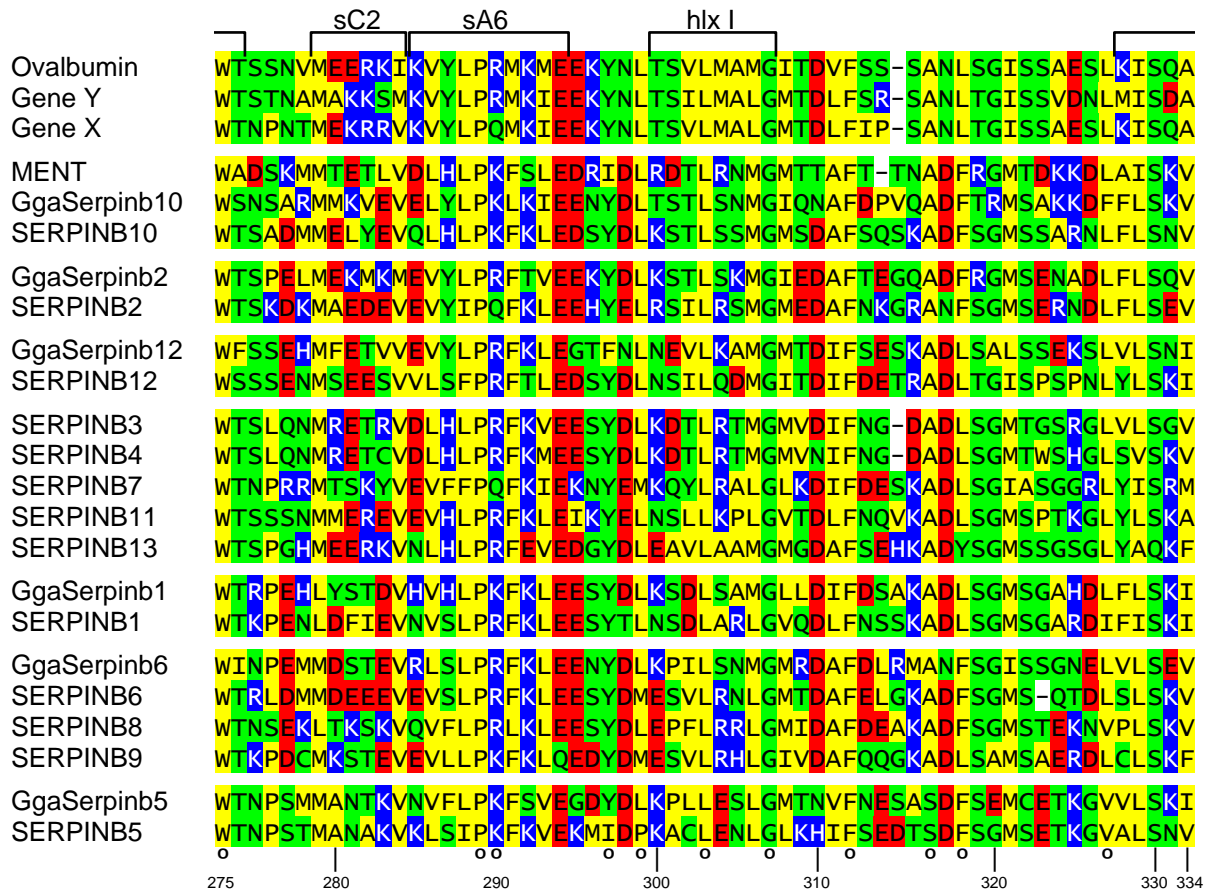

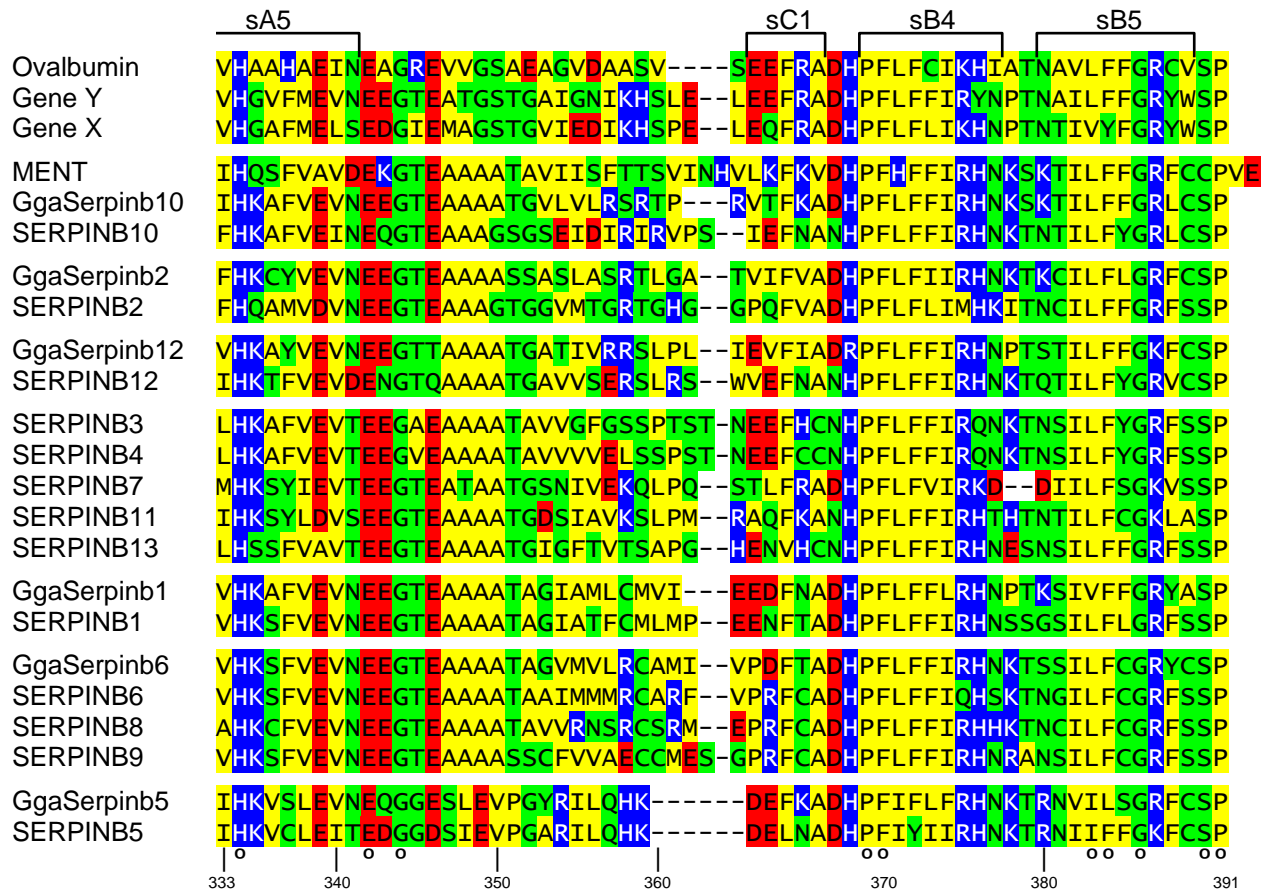

Supplement: pnas_0502934102_1.pdf [file pnas_0502934102_1.pdf]

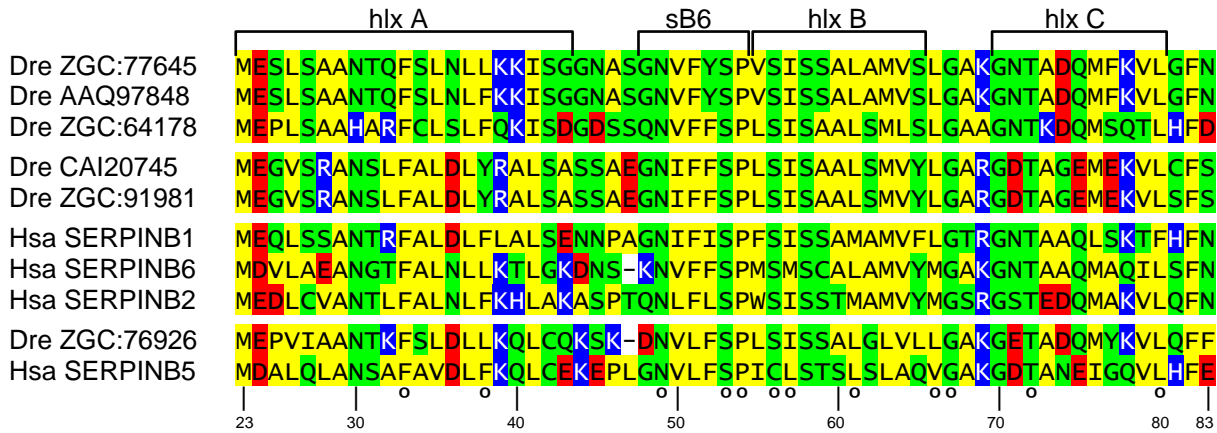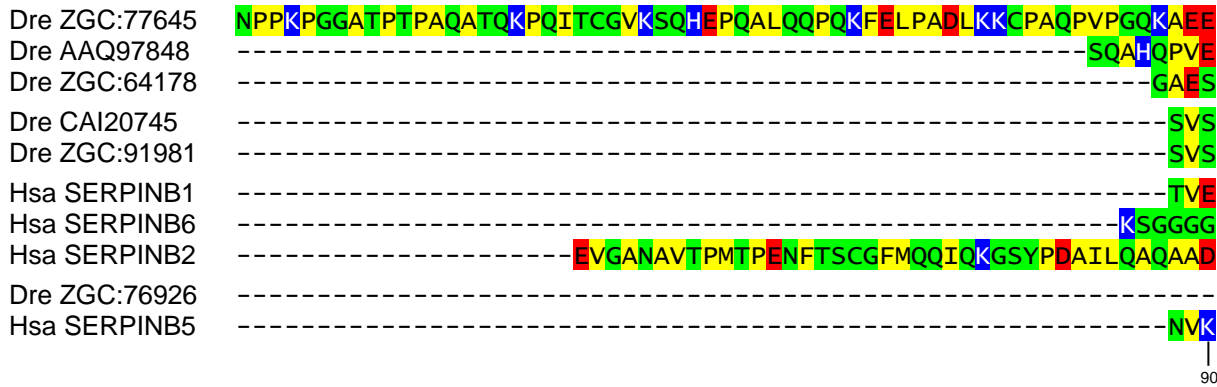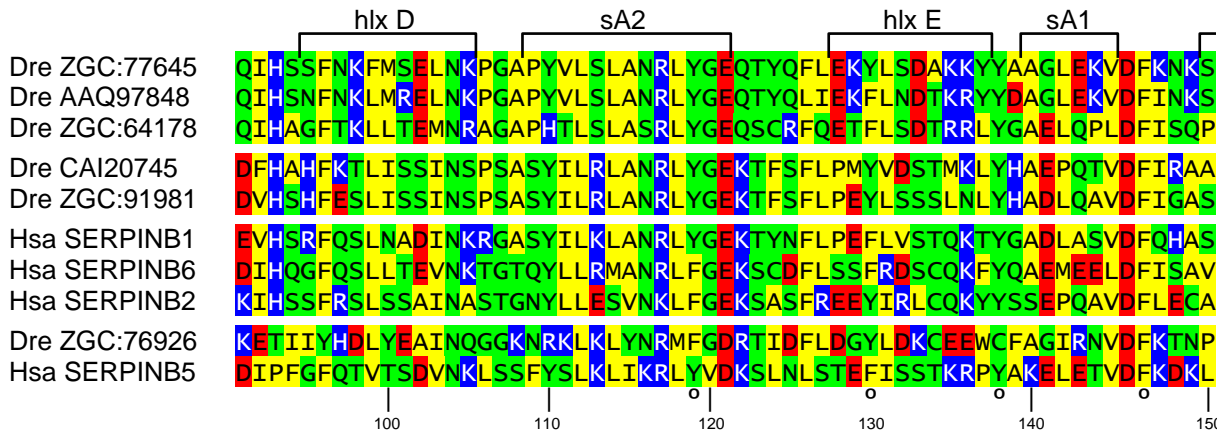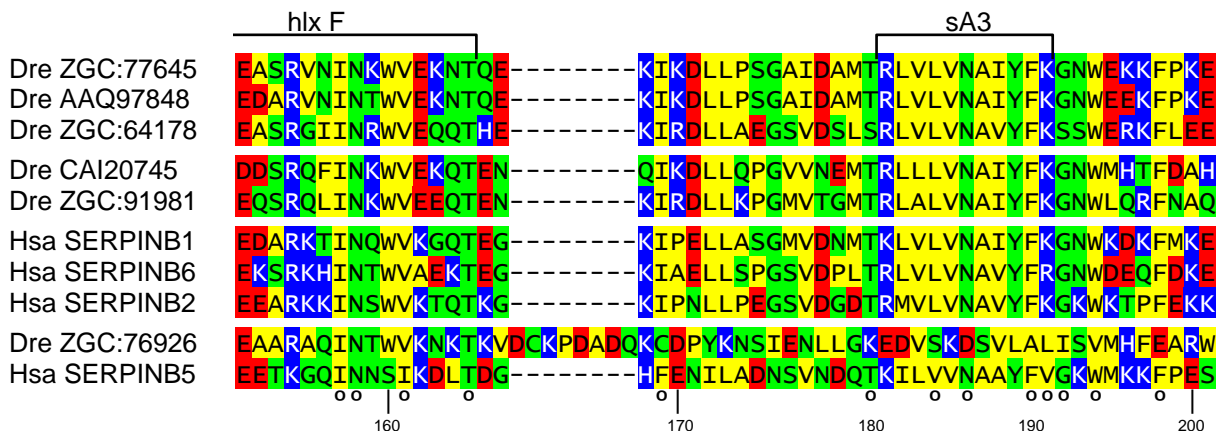

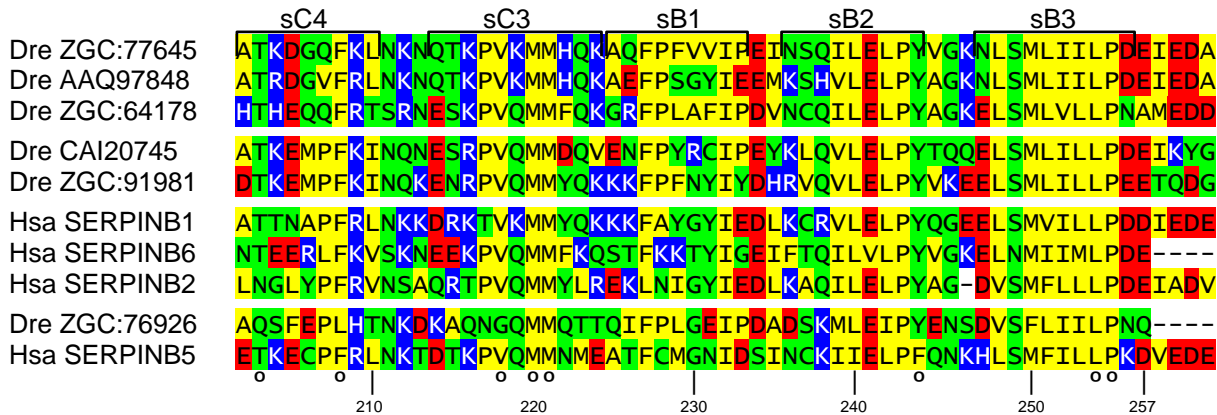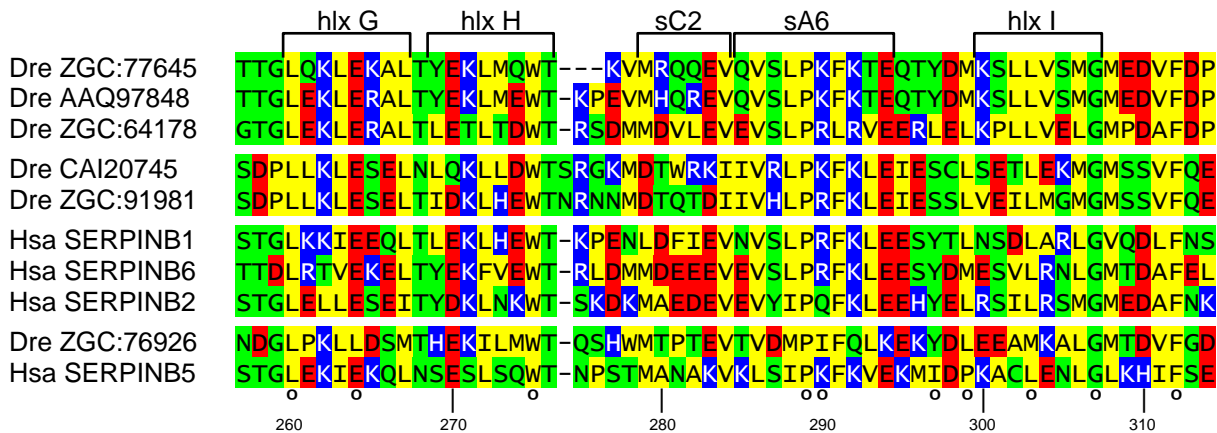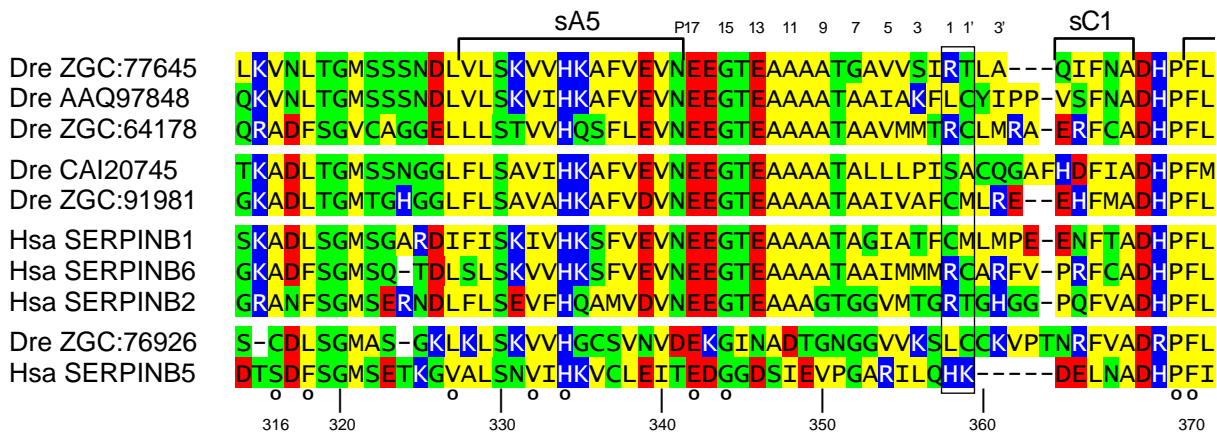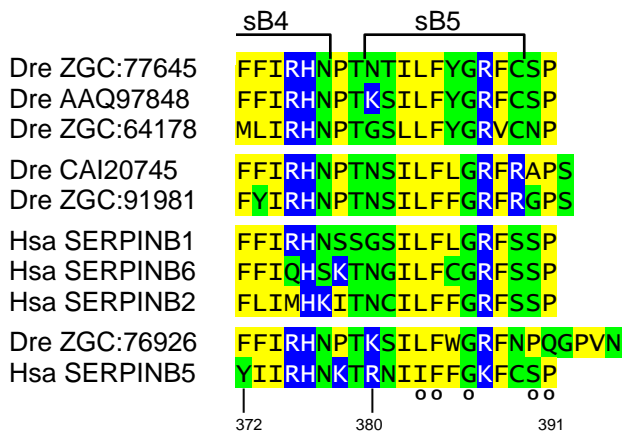

Supplement: pnas_0502934102_2.pdf [file pnas_0502934102_2.pdf]
